# Supplementary material for: Nutrient availability shapes the microbial community structure in sugarcane bagasse compost-derived consortia
Source: PubMed Central journal article supplement (PMC5150498; doi:10.1038/srep38781), 2016-12-12
Supplement: srep38781-s1.pdf [file srep38781-s1.pdf]

## Supplementary Information

### Nutrient availability shapes the microbial community structure in sugarcane bagasse compost-derived consortia

Bruno L. Mello<sup>1\*</sup>, Anna M. Alessi<sup>2\*</sup>, Simon McQueen-Mason<sup>2</sup>, Neil C. Bruce<sup>2</sup>, and Igor Polikarpov<sup>1</sup>

\* These authors contributed equally to this work.

<sup>1</sup>Instituto de Física de São Carlos, Universidade de São Paulo, Av. Trabalhador São-carlense 400, São Carlos, SP, 13560-970, Brazil, e-mails: [bruno.luan.mello@usp.br](mailto:bruno.luan.mello@usp.br); [ipolikarpov@ifsc.usp.br](mailto:ipolikarpov@ifsc.usp.br)

<sup>2</sup>Department of Biology, University of York, Wentworth Way, York, UK, YO10 5DD, emails: [anna.szczepanska@york.ac.uk](mailto:anna.szczepanska@york.ac.uk); [simon.mcqueenmason@york.ac.uk](mailto:simon.mcqueenmason@york.ac.uk); [neil.bruce@york.ac.uk](mailto:neil.bruce@york.ac.uk)

**Corresponding author** Igor Polikarpov, Instituto de Física de São Carlos, Universidade de São Paulo, Av. Trabalhador São-carlense 400, São Carlos, SP, 13560-970, Brazil

Phone +55 16 3373-8088, fax +55 16 3373-9881, email: [ipolikarpov@ifsc.usp.br](mailto:ipolikarpov@ifsc.usp.br)

### Supplementary Figure 1

Qualitative overview of sugarcane bagasse biomass collected from MM and PCS grown compost-derived consortia during five-week time course showing morphological changes such as particle size reduction, color darkening and biomass softening.

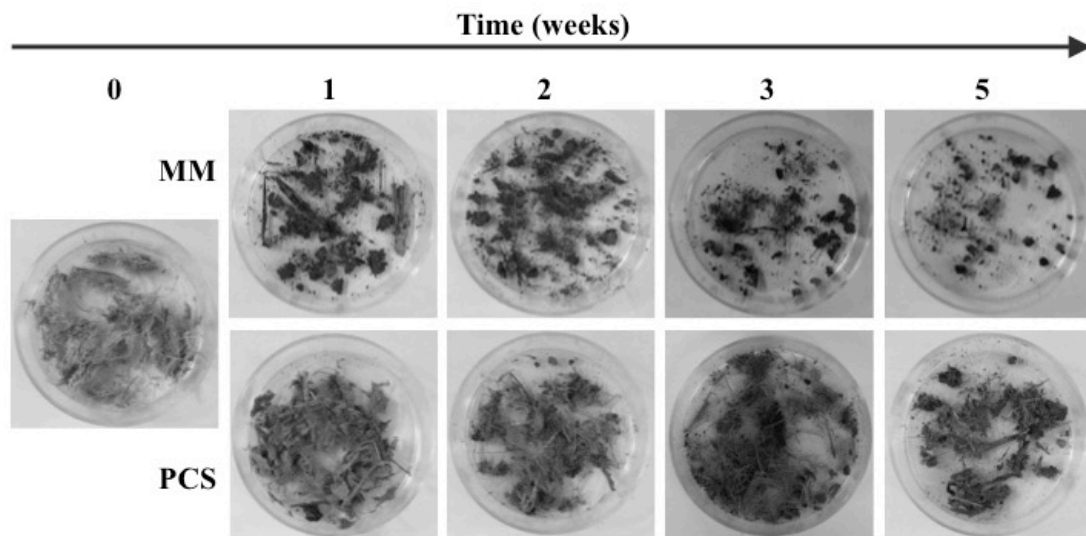

## Supplementary Table 1

Relative abundance values for twenty most abundant OTUs present in a) MM- and b) PCS-grown communities. Bolded taxa are present in both tables.

A)

| phylum         | class                                     | order                  | family                   | genus                | Mean abundance in MM community (%) | Mean abundance in PCS community (%) | Cumulative contribution to dissimilarity in MM (%) |
|----------------|-------------------------------------------|------------------------|--------------------------|----------------------|------------------------------------|-------------------------------------|----------------------------------------------------|
| Actinobacteria | Actinobacteria                            | Actinomycetales        | Cellulomonadaceae        | Cellulomonas         | 6.7                                | 0.0                                 | 6.7                                                |
| Acidobacteria  | <b>Chloracidobacteria</b>                 | <b>RB41</b>            | <b>Ellin6075</b>         | <b>unknown</b>       | 5.8                                | 1.3                                 | 12.5                                               |
| Actinobacteria | Actinobacteria                            | Actinomycetales        | unknown                  | unknown              | 4.8                                | 0.5                                 | 17.3                                               |
| Bacteroidetes  | Flavobacteriia                            | Flavobacteriales       | Cryomorphaceae           | unknown              | 3.6                                | 0.0                                 | 21.0                                               |
| Firmicutes     | Bacilli                                   | Bacillales             | Paenibacillaceae         | Paenibacillus        | 3.2                                | 0.1                                 | 24.1                                               |
| Proteobacteria | $\gamma$ -proteobacteria                  | Alteromonadales        | Alteromonadaceae         | unknown              | 3.0                                | 0.3                                 | 27.1                                               |
| Bacteroidetes  | <b>Saprospirae</b>                        | <b>Saprospirales</b>   | <b>Chitinophagaceae</b>  | <b>unknown</b>       | 2.6                                | 5.5                                 | 29.7                                               |
| Proteobacteria | $\gamma$ -proteobacteria                  | Xanthomonadales        | Xanthomonadaceae         | unknown              | 2.3                                | 0.1                                 | 32.0                                               |
| Proteobacteria | <b><math>\alpha</math>-proteobacteria</b> | <b>Caulobacterales</b> | <b>Caulobacteraceae</b>  | <b>Asticcacaulis</b> | 2.3                                | 7.6                                 | 34.3                                               |
| Proteobacteria | $\alpha$ -proteobacteria                  | Caulobacterales        | Caulobacteraceae         | unknown              | 2.3                                | 0.8                                 | 36.6                                               |
| Proteobacteria | $\alpha$ -proteobacteria                  | Rhizobiales            | unknown                  | unknown              | 2.2                                | 0.9                                 | 38.8                                               |
| Proteobacteria | $\gamma$ -proteobacteria                  | Xanthomonadales        | Sinobacteraceae          | unknown              | 2.1                                | 0.3                                 | 40.9                                               |
| other kingdom  | -                                         | -                      | -                        | -                    | 2.0                                | 1.8                                 | 43.0                                               |
| Planctomycetes | Planctomycetia                            | Pirellulales           | Pirellulaceae            | unknown              | 2.0                                | 0.6                                 | 45.0                                               |
| Planctomycetes | Planctomycetia                            | Pirellulales           | Pirellulaceae            | A17                  | 1.9                                | 0.0                                 | 46.8                                               |
| Chloroflexi    | Anaerolineae                              | Caldilineales          | Caldilineaceae           | unknown              | 1.8                                | 0.9                                 | 48.7                                               |
| Proteobacteria | <b><math>\alpha</math>-proteobacteria</b> | <b>Rhizobiales</b>     | <b>Hyphomicrobiaceae</b> | <b>Devosia</b>       | 1.7                                | 3.0                                 | 50.4                                               |
| Bacteroidetes  | <b>unknown</b>                            | <b>unknown</b>         | <b>unknown</b>           | <b>unknown</b>       | 1.7                                | 2.0                                 | 52.1                                               |
| Planctomycetes | Planctomycetia                            | Planctomycetales       | Planctomycetaceae        | Planctomyces         | 1.7                                | 0.6                                 | 53.8                                               |
| Proteobacteria | $\gamma$ -proteobacteria                  | Xanthomonadales        | Xanthomonadaceae         | unknown              | 1.6                                | 0.5                                 | 55.4                                               |
| Proteobacteria | $\alpha$ -proteobacteria                  | Rhodobacterales        | Hyphomonadaceae          | unknown              | 1.6                                | 0.0                                 | 57.0                                               |

B)

| phylum          | class                                     | order                  | family                   | genus                | Mean abundance in MM community (%) | Mean abundance in PCS community (%) | Cumulative contribution to dissimilarity in PCS (%) |
|-----------------|-------------------------------------------|------------------------|--------------------------|----------------------|------------------------------------|-------------------------------------|-----------------------------------------------------|
| Bacteroidetes   | Saprospirae                               | Saprospirales          | Chitinophagaceae         | unknown              | 0.9                                | 10.2                                | 10.2                                                |
| Bacteroidetes   | Saprospirae                               | Saprospirales          | Saprospiraceae           | unknown              | 0.6                                | 10.0                                | 20.2                                                |
| Proteobacteria  | <b><math>\alpha</math>-proteobacteria</b> | <b>Caulobacterales</b> | <b>Caulobacteraceae</b>  | <b>Asticcacaulis</b> | 2.3                                | 7.6                                 | 27.9                                                |
| Bacteroidetes   | Cytophagia                                | Cytophagales           | unknown                  | unknown              | 1.5                                | 6.2                                 | 34.1                                                |
| Bacteroidetes   | <b>Saprospirae</b>                        | <b>Saprospirales</b>   | <b>Chitinophagaceae</b>  | <b>unknown</b>       | 2.6                                | 5.5                                 | 39.6                                                |
| Bacteroidetes   | Sphingobacteriia                          | Sphingobacterales      | Sphingobacteriaceae      | unknown              | 0.1                                | 4.5                                 | 44.1                                                |
| Bacteroidetes   | Sphingobacteriia                          | Sphingobacterales      | Sphingobacteriaceae      | Sphingobacterium     | 0.0                                | 3.6                                 | 47.7                                                |
| Proteobacteria  | <b><math>\alpha</math>-proteobacteria</b> | <b>Rhizobiales</b>     | <b>Hyphomicrobiaceae</b> | <b>Devosia</b>       | 1.7                                | 3.0                                 | 50.7                                                |
| Bacteroidetes   | Flavobacteriia                            | Flavobacteriales       | Weeksellaceae            | unknown              | 0.0                                | 3.0                                 | 53.6                                                |
| Chloroflexi     | Anaerolineae                              | SBR1031                | A4b                      | unknown              | 0.7                                | 2.7                                 | 56.3                                                |
| Proteobacteria  | $\gamma$ -proteobacteriia                 | Alteromonadales        | Alteromonadaceae         | Cellvibrio           | 1.5                                | 2.6                                 | 58.9                                                |
| Bacteroidetes   | Cytophagia                                | Cytophagales           | Cytophagaceae            | Leadbetterella       | 0.9                                | 2.3                                 | 61.2                                                |
| Bacteroidetes   | <b>unknown</b>                            | <b>unknown</b>         | <b>unknown</b>           | <b>unknown</b>       | 1.7                                | 2.0                                 | 63.2                                                |
| other kingdom   | -                                         | -                      | -                        | -                    | 2.0                                | 1.8                                 | 65.0                                                |
| Proteobacteria  | $\alpha$ -proteobacteriia                 | BD7-3                  | unknown                  | unknown              | 0.1                                | 1.7                                 | 66.8                                                |
| Firmicutes      | Bacilli                                   | Bacillales             | Planococcaceae           | unknown              | 0.0                                | 1.7                                 | 68.4                                                |
| Verrucomicrobia | Spartobacteriia                           | Chthoniobacterales     | Chthoniobacteraceae      | heteroC45_4W         | 0.1                                | 1.5                                 | 70.0                                                |
| Bacteroidetes   | Flavobacteriia                            | Flavobacteriales       | Flavobacteriaceae        | unknown              | 0.4                                | 1.5                                 | 71.5                                                |
| Acidobacteria   | <b>Chloracidobacteria</b>                 | <b>RB41</b>            | <b>Ellin6075</b>         | <b>unknown</b>       | 5.8                                | 1.3                                 | 72.8                                                |
| Proteobacteria  | $\alpha$ -proteobacteriia                 | Rhodobacterales        | Rhodobacteraceae         | unknown              | 1.2                                | 1.2                                 | 74.0                                                |
| Proteobacteria  | $\alpha$ -proteobacteriia                 | Rhizobiales            | Hyphomicrobiaceae        | unknown              | 0.9                                | 1.1                                 | 75.1                                                |
